# Supplementary material for: Members of the Cyr61/CTGF/NOV Protein Family: Emerging Players in Hepatic Progenitor Cell Activation and Intrahepatic Cholangiocarcinoma
Source: Hindawi journal article supplement (doi:10.1155/2016/2313850), 2016-01-01

Supplemental Figure 1

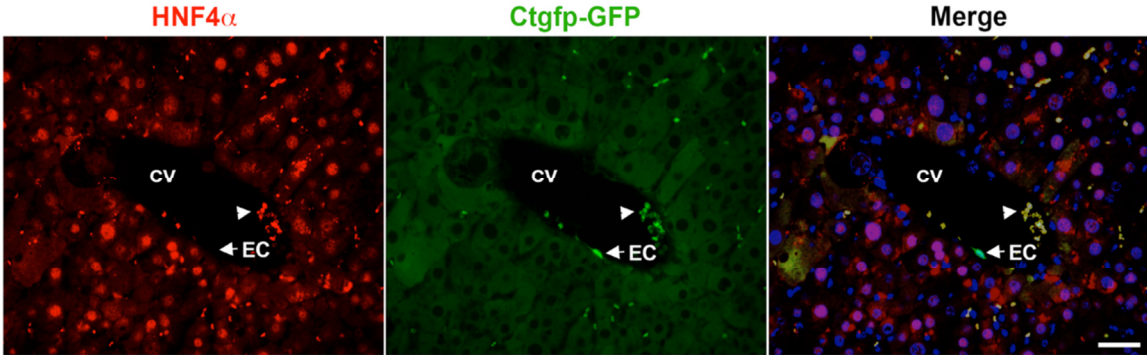

Supplemental Figure 2  
Glutamine synthetase

Ctgifp-GFP

Merge

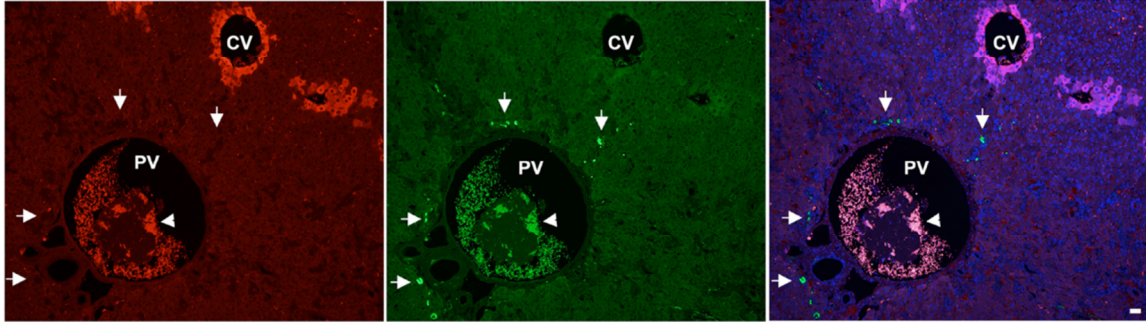

Supplemental Figure 3

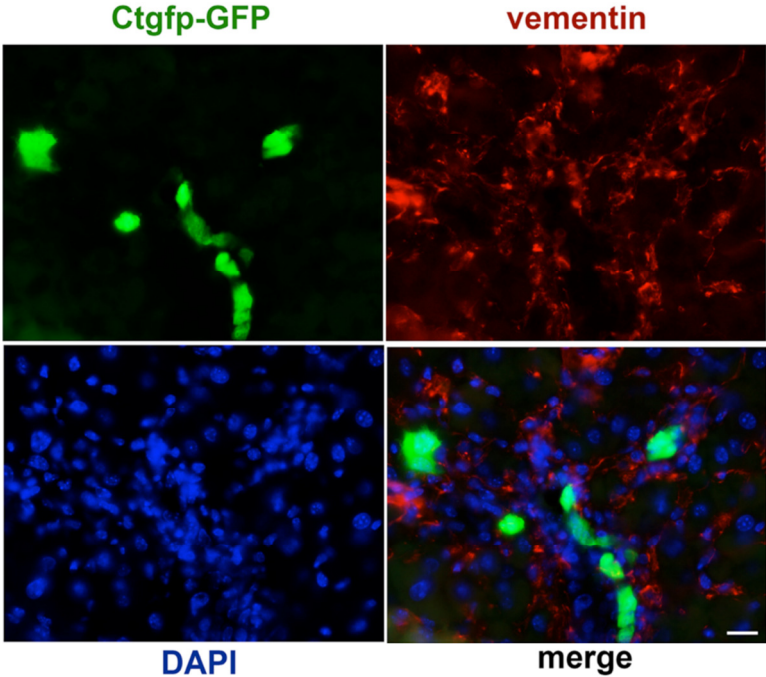

Supplement: f1 [file 2313850.f1.pdf]
